# Supplementary material
Source: PubMed Central journal article supplement (PMC5474076)
Supplement: rspb20170577supp1.pdf [file rspb20170577supp1.pdf]

## **Supplementary Materials for**

### Primate energy input and the evolutionary transition to energy-dense diets in humans

Bruno Simmen, Patrick Pasquet, Shelly Masi, Georgius J.A. Koppert,  
Jonathan C.K. Wells, Claude Marcel Hladik

#### **This supplementary file includes:**

Supplementary notes 1-5

Supplementary tables 1-5

Supplementary figures 1-3

Supplementary references

#### **Supplementary note 1. Food intake data in non-human primates and humans**

*Non human primate taxa.* Primate species studied show diverse phylogenetic relatedness (Strepsirhines and Haplorhines), geographic and ecological diversity, and almost span the full range of body size found in living Primates (table S1). They also have diets that require morphological and physiological specializations (hindgut and foregut fermenters among folivorous species) or diets associated with a simple digestive tract as in omnivorous species or species that primarily feed on ripe fruits or a combination of arthropods and fruits.

*Food intake.* The quantitative method used by field primatologists to estimate food intake is based on direct observation of ingestion and counts of mouthfuls, supplemented with records of feeding rates, usually obtained by following individuals from dawn to dusk. Mouthfuls are converted into wet/dry matter of ingested food, weighing aliquot amounts of each food item [28, 29]. The evaluation of daily food intake in primates living under natural conditions is inherently imperfect, since the weight of foods ingested cannot be directly measured, unlike in closely-controlled human studies. However, previous research has shown that the most reliable and consistent results are obtained with the mouthful method [30,31] ([32] for a comparison with stomach contents). The

prerequisites are: sufficient visibility and full habituation of groups or individuals to human observers allowing tracking of animals at a close distance. We discarded studies that determined the contribution to the diet of food items (a) based on the time the animals were feeding on these items or (b) using the feeding frequency method (as opposed to the estimation of ingested quantities), both of which poorly reflect the amount of food consumed [28-30]. We also discarded studies that involved food provisioning prior to actual measurements of food intake, and some early studies that clearly underestimated energy intake.

In human populations studied, foods or dishes consumed during a meal by individuals or groups of individuals are weighed [32]. In the present paper, we only used data for adult men and women, but field records were obtained from whole families, each surveyed on a weekly basis. In most populations food was consumed in relatively small groups of 1-3 individuals often composed of people of the same gender and age. The food consumption was estimated from common dishes by an iterative process that estimated sharing coefficient within 15 sex and age groups, as defined by the FAO [33]. Sharing coefficient stabilized after 2-3 iterations and did not change anymore after 5 iterations (details in [24,34]). Sharing coefficient allowed to estimate individual consumption in mixed groups. For instance 23,376 dishes were consumed among the Yassa by consumer groups from these 15 sex and age categories (requiring a huge numbers of observers). The first step was to divide each dish equally among its consumers, and average the result for each group. The average consumption of men over 50 years (category 9) is almost 120% of the average of men 20-49, while for group 4 (boys 10-12y) it is about 65%. Using these sharing coefficients (120% and 65%) in a second iteration hardly changes the results, because these two categories eat in homogeneous separate groups. The youngest children usually eat in groups with various other age groups and adults, so that the successive iterations lead later to an equilibrium of the sharing coefficients.

Data on food intake, energy intake and study sites in primate species and human populations tested are summarized in tables S1, S2 and S4.

## Supplementary note 2. Energy input models in non-human primates

*Models and databases.* We focused on studies that aim to estimate ‘metabolizable energy intake’, ie the proportion of ingested energy that is metabolised according to species’ digestive physiology. Formally, metabolizable energy content of the diet is the gross energy content adjusted for losses in faeces and urine. Typically, however, most studies of primate energy input assess separately protein, fat, neutral detergent fibres (NDF, i.e. cellulose + hemicellulose + lignin) and soluble sugars or total non-structural (or water soluble) carbohydrates (TNC) content in the diet and use energy conversion factors and species-specific digestibility coefficients to calculate metabolizable energy intake. For instance, the metabolizable energy obtained from fibres depends on fermentation and symbiotic activity from the gut microbiota, and is inferred using digestibility coefficients derived from tests on captive primates (or more rarely, wild individuals temporarily kept in a cage). The standard energy conversion for protein, carbohydrate and fat is 4 kCal.g<sup>-1</sup>, 4 kCal.g<sup>-1</sup>, 9 kCal.g<sup>-1</sup> but a value of 3 kCal.g<sup>-1</sup> is usually preferred for structural carbohydrates to account for the energy used by the intestinal microbiota themselves [44]. TNC is commonly calculated by subtraction as [100- (protein+NDF+fat+ash)]%, following previous application to the determination of human food composition, but this procedure has been regularly questioned, *e.g.* [29, 45-47]. In our primate sample (table S3), TNC determined by subtraction (hereafter referred to as TNC<sub>sub</sub>) account for 20 to 64% of the dry matter according to primate diets, but such calculation also captures a range of non-carbohydrate components, including organic acids, vitamins, micronutrients, resins and secondary metabolites, some of which may amount to a substantial proportion in primate diets compared with human foods. For instance, condensed tannins reach 20% of the total dry matter of some leaves eaten by mountain gorillas (using internal standards for calibration curves [49]; see also [50]: 7-26% in legume leaves). Therefore, calculating TNC by subtraction may overestimate energy input if other non-caloric substances occur in foods. The concentration of water-soluble sugars has been measured as a substitute for TNC in some studies (*Gorilla beringei beringei*,

*Alouatta palliata*, *Cebus capucinus*, *Saguinus geofroyi*), but this assay detects only part of the stored soluble sugars beside simple sugars, and does not measure soluble fibres like pectin [29].

Therefore, daily metabolizable energy intake was compared between primate species in our allometric analyses using two databases separately: one set of results corresponding to energy intake calculated according to  $TNC_{sub}$  as published in the original papers, which we referred to as the “High-Energy Value of the Diet” (HEVD) database; and a “Low-Energy Value of the Diet” (LEVD) database in which we reduced the energy contribution of  $TNC_{sub}$  according to current knowledge of the soluble carbohydrate content of primate foods (table S1; details of calculation below). Since the available information on the spectrum and concentration of the different categories of non-structural carbohydrates in primate diets is fragmentary, we estimated non-structural carbohydrates in the LEVD model by combining information about the concentration of soluble sugar (fructose, glucose and sucrose) with that on starch and soluble fibre in primate diets, supplemented with data from tropical plants.

In the LEVD model, we followed the rule that when the original studies reported the concentration of simple soluble sugars but not of soluble fibre, we calculated total daily energy intake assuming an average concentration of 5% as starch plus 5% as pectin in the total dry matter ingested daily, in addition to the other nutrients assessed. These starch and pectin concentrations are rounded figures derived from our review of primate food chemistry (see ‘*Non-structural carbohydrates in the LEVD model*’). If water-soluble carbohydrates were reported, only a concentration of 5% as pectin was added for calculation of energy input. Finally, when daily energy intake was calculated based on  $TNC_{sub}$  determination in the original study (i.e. HEVD), we multiplied reported energy intake by a correction factor of 74%. This factor represents the average difference between energy intake calculated combining the concentrations of individual components of non-structural carbohydrates (soluble sugars, starch and pectin) with other nutrients versus the HEVD mode of calculation (see below the rationale and table S3). In one study, metabolizable energy input was calculated from the gross energy content of foods ( $\text{kJ.g}^{-1}$ ) measured

by bomb calorimetry, supplemented with an assessment of energy loss in faeces (*Leontopithecus rosalia*: [10]). Energy intake reported in this study was assigned to the LEVD model group.

*Non-structural carbohydrates in the LEVD model:* Simple soluble sugars represent on average  $48 \pm 13$  % of  $TNC_{sub}$  in primate diets primarily composed of ripe fruits supplemented with leaves and flowers, and only  $15 \pm 5$ % in diets primarily including vegetative plant parts (weighted intake data; table S3). In the western gorilla's diet, for which we performed a more detailed analysis of food nutrient content [22], the contribution of simple soluble sugars to  $TNC_{sub}$  is similar to that of other primates and accounts, together with starch, for only a slightly higher proportion of  $TNC_{sub}$ , averaging  $52 \pm 14$ % in fruits and  $20 \pm 18$ % in non-reproductive plant parts. Starch concentration in the gorilla diet is consistent with the few data published for other primates as well as for tropical cultivated plants, with values averaging 3-6% in ripe and unripe fruits and 1-4% in vegetative plant parts overall [8,22,51,52]. Beside simple sugars and starch, other nutrient categories like soluble fibres in the  $TNC_{sub}$  fraction provide readily digestible energy. Pectins were found to average 4-6% of the dry matter in fruits and leaves eaten by wild howler monkeys, the only primate species for which data are available [53]. Pectins are widespread in fruit and some tropical leaves [29], but low concentrations have generally been reported in tropical fruits (0.2-1% of the wet weight; e.g. [54]).

Assuming pectin content of the diet of western gorillas and the different primate species of table S4 are similar to that found for howler monkeys, the summed percentage of soluble sugars, starch and pectin would account for  $44 \pm 9$ % of  $TNC_{sub}$  in leaf-/unripe fruit-based diets ( $n=11$ ) versus  $68 \pm 10$ % in ripe fruit-based diets ( $n=7$ ). However the  $TNC_{sub}$  percentage of the total dry matter ingested is lower when leaf /unripe fruits dominate in diets (35 vs 54% on average). Accordingly, the results show that whatever the food categories dominating diets, energy input calculated by summing all different non-structural carbohydrate fractions (i.e. the LEVD model) account for a similar proportion of energy input calculated with the HEVD model, averaging  $74 \pm 8$ % (table S3).

*Specific calculations:*

*Propithecus coronatus*, *Propithecus verreauxi* (gallery forest), *Lemur catta*, *Eulemur sp.*, *Eulemur fulvus mayottensis*. Data on protein, lipid, NDF and simple soluble sugars in the seasonal diets of these species were supplemented with chemical assays on ash content (and NDF in *E.f. mayottensis*). This allowed us to assess the contribution of soluble sugars to total non-structural carbohydrates (TNC) determined by subtraction and to build the two different models of energy intake (see ‘Energy input models’ above). When NDF content in the diet of *Eulemur* species studied was < 31%, we used a 41% NDF digestibility coefficient to evaluate the amount of energy derived from microbial fermentation [55]. When fibre content was higher (usually dry season diets) we used 20% fibre digestibility on the basis that cellulose digestibility is only 0 to 21% according to particle size in *Eulemur fulvus* (0 to 30% in *Lemur catta*; [56]) and NDF digestibility in the closely related *Eulemur macaco* is only 12% when fed fibre-rich diets > 31% [57]. The same criteria were used for *Lemur catta*. In captive sifakas fed the same 31% NDF diet as that used for *Eulemur*, NDF digestibility is 60% but is reduced to 41% if the diet contains a higher fibre content (*Propithecus verreauxi*; see also *P. tattersalli*; [55,58]). Since the two wild *Propithecus* populations tested had fibre-rich diets, we used a 41% NDF digestibility coefficient in each case. Body mass data for *P. verreauxi* ( $N = 25$ ) have been collected in 2014 at Berenty Private Reserve by Simmen *et al.* as part of an on-going project on the energetics and reproduction in the sifaka.

*Propithecus verreauxi* (dry deciduous forest). One population (9-11 focal individuals from 2-3 groups) was studied over a 6-month period (858 hours) in a dry deciduous forest south of Madagascar in the Berenty Private Reserve. Nutrient input was estimated on adult males and females at two different seasons, including part of the lean season during the austral winter (July-September 2007) and during the early wet season when rainfall resumes and young leaves and flowers are abundant (October-December 2009). Since NDF content in the diet varied seasonally

from 30 to 37%, we used 60% and 41% NDF digestibility respectively in our calculations of energy intake (see above). Feeding data were collected by BS, Zoly Sarah and F. Ravahatramananjarasoa. Body mass data have been collected in 2014 at Berenty Private Reserve by Simmen *et al.* (same research project as mentioned above for gallery forest sifakas).

*Propithecus diadema*. We selected 2007 data corresponding to one sifaka group that contained non-reproductive individuals (group “Cont 2” during austral winter, fig 1 in [7]).

*Alouatta pigra*. We added NDF (from table IV in [13] in the calculation of total energy input (using 45% NDF digestibility in howler monkeys; [59]).

*Ateles chamek*. We added 36% NDF (table II in [48]) in the calculation of total energy input using 23% NDF digestibility for a monogastric fruit-specialist primate (average from [55,57,60]).

*Gorilla gorilla*. Daily food intake data for the silverback male were collected and calculated by SM from one habituated group of Western gorillas in Bai Hokou Central African Republic (December 2004-December 2005). Energy intake, as published in [22], is derived from these measures.

### **Supplementary note 3. Intake-based estimates of energy expenditure vs doubly labelled water measurements (non-human primates) or calorimetry (humans)**

- *Primate studies*. Since two modes of calculation (HEVD, LEVD) were used to investigate metabolizable energy intake of wild primates, we tested whether results derived from these models can be equated with total energy expenditure (TEE) measured with doubly labelled water, the gold standard method for measuring TEE. We follow here [61,62] who, based on the isotopic method, emphasize the lack of substantial variation in energy expenditure between seasons across a range of homeothermic mammal species, or between captive and wild subjects of the same species

(including primates), or between hunter-gatherers and sedentary urban populations after correcting for body mass differences. One explanation why TEE is maintained within a narrow physiological range, though there are exceptions, seems to be that the body is able to compensate for the increased physical activity by modifying the energetic allocation to the other functions (e.g. through changes of BMR or reproductive investment; [61,63,64]).

As a first approach, we tested whether HEVD and LEVD results can be equated with TEE in the same species. Paired-data available for use in this analysis are limited to 8 species. We minimized the risk of including long periods of negative and positive energy balance in species showing large seasonal changes in energy intake (*L. catta*, *E. fulvus*, *P. pygmaeus*, *P. diadema*) by selecting periods intermediate between lean and high-food supply seasons. Energy intake estimated with the HEVD model was significantly higher than TEE (Wilcoxon signed rank test for non-normal distribution; mean difference =  $1,770 \pm 2,208 \text{ kJ.day}^{-1}$ ,  $W = 28$ ,  $P < 0.02$ ,  $df = 6$ ; Table S5). In contrast, there was no significant difference between the LEVD data and TEE data (paired-sample *t*-test, controlling for normality of the data: mean difference =  $144 \pm 606 \text{ kJ.day}^{-1}$ ,  $t = 0.492$ ,  $P < 0.7$ ,  $df = 7$ ; table S5) suggesting that this model more closely reflects the amount of metabolizable energy available to primates than the HEVD model. Since the non-human primate data used in the allometric comparisons with humans were averaged between different periods of the year (figure 1), we re-ran the comparison of intake-based estimates vs TEE using the averaged data (table S1). Again, energy intake estimated with the HEVD model provided overestimated values (mean difference =  $1,897 \pm 2,311 \text{ kJ.day}^{-1}$ ,  $W = 28$ ,  $P < 0.02$ ,  $df = 6$ ) whereas no significant difference was detected between LEVD and TEE (mean difference =  $245 \pm 764 \text{ kJ.day}^{-1}$ ,  $t = 0.737$ ,  $P < 0.5$ ,  $df = 7$ ).

As a complementary approach, we contrasted the slope and intercept of the allometric relationships found using HEVD or LEVD with those derived from the TEE:mass relationship published in [65] excluding the torpid lesser mouse lemurs:  $\log(\text{daily energy expenditure, in kJ.day}^{-1}) = 0.449 + 0.734 \log \text{BM}$ , where BM is body mass in g, with energy expenditure values measured

with doubly labelled water and converted in  $\text{kJ}\cdot\text{day}^{-1}$  (using a 4.18 multiplication factor). In this comparison based on the whole set of primate species contributing to the databases on energy input and energy output, the LEVD model was also the most consistent (figure S2). The allometric coefficient was close to 0.75, indicating that the larger the primates the less energy they consumed per gram body mass, as expected. The intercept of the regression line for LEVD data was almost identical to that for TEE, with a mean deviation of only  $108 \pm 27\%$  above the TEE:mass slope (versus  $131 \pm 25\%$  for the HEVD model).

- *Human studies.* As for non-human primates, energy input estimates in humans are subject to some degree of inaccuracy. For instance, nutritional composition tables used classically to assess energy input from raw and cooked foods may not correctly account for the net effect of cooking and non-thermal processes on energy input. For example, cooking increases the digestibility of resistant starch but can also reduce the amount of energy available according to the mode of preparation of a dish (e.g. potential loss of nutrients through amylose and amylopectin solubilization in boiled starchy foods, or fat loss due to dripping in roasted meat [66]). Accordingly, as for non-human primates, we assessed whether estimated daily energy input equates daily energy expenditure. Together with the food intake studies carried out during three seasons to cover an annual cycle, daily energy expenditure was investigated by one of us (PP) in men and women in 4 of the populations tested using repeated short-term respirometry measurements (Douglas bag technique). These physiological measurements were made during major daily activities, including resting at wakening (supplemented with estimates of the costs of minor activities and sleep), and were weighted according to individual time budgets, allowing total daily energy expenditure to be estimated [67,68] (table S5). Daily metabolizable energy intake did not differ significantly from daily energy expenditure in these populations (two-tailed paired-sample  $t$  test after controlling for normality with Shapiro-Wilk test and considering men and women as separate samples in each of the four populations, mean difference =  $-220 \pm 747 \text{ kJ}\cdot\text{day}^{-1}$ ,  $t = -0.833$ ,  $P < 0.5$ ,  $df = 7$ ). Therefore,

energy intake estimates are sufficiently reliable when they are averaged across the human sample studied (with the same protocol) for an interspecific comparative purpose.

In these human populations, the mean deviation of energy expenditure relative to the primate TEE:mass relationship was  $119 \pm 12\%$ . They had lower TEE and physical activity level (average PAL: 1.75, range: 1.65-1.81; table S5) than some other farming populations, for instance Massa or Gambian farmers, but the latter practice cash agriculture and were measured during the peak of agricultural season [69-71].

#### **Supplementary note 4. Statistical analyses of food and energy intake**

We used phylogenetic least squares regressions (PGLS) to control for phylogenetic effects in allometric analyses [72]. We first reconstructed a phylogenetic tree (figure S1) from the published database of Bininda-Emonds *et al.* [73] on mammal phylogenetic relationships with branch length specified. When relevant, Perelman *et al.*'s [74] and Zinner *et al.*'s [75] primate phylogenies were used to specify relationships unresolved in the Bininda-Emonds *et al.* database. The strength of the phylogenetic signal ( $\lambda$ ) in regression analyses was determined according to maximum likelihood in BayesTraits v2 (on-line version of July 2013; [76, 77]). Best-fit models were assessed from log-likelihood (Lh) scores [78]. Differences are considered significant at  $\alpha < 0.05$ .

#### **Supplementary note 5. Costs of digestion and diet**

As both body mass and meal size can be used to predict the cost of specific dynamic action in humans ( $SDA = 1.83 \text{body mass (in kg)} + 0.26 \text{meal mass (in g)} + 123.6$ ; [79]), we calculated that an individual would save  $\sim 600 \text{ kJ.d}^{-1}$  by reducing the quantity of food ingested to as low as 36% that of a primate with similar mass, as we report in this study (figure 2). The volume of food, raw or combined with cooked foods, that our hunter-gatherer ancestors have been consuming is unknown, nonetheless one study [80] documents the foraging effort and yield of Baka familial groups engaged for several months in expeditions dedicated to hunting and gathering. These activities yield

about  $2 \text{ kg.d}^{-1}$  per individual of edible fresh food, mainly yam and meat as a complement (versus  $1.5 \text{ kg.d}^{-1}$  on average in subsistence populations tested). These forest foods represent only 40% of the mass of food consumed daily by a primate with similar mass (36% in our populations, as mentioned above), which would then result in a  $\sim 500 \text{ kJ.d}^{-1}$  SDA reduction based on the same predictive equations.

Of course, food reduction has occurred over a much longer time scale during human evolution and its impact on the evolution of the energy budget cannot simply be extrapolated from short-term food restriction studies. Overall, however, these calculations converge to indicate that with reliance on easier-to-digest diets and the “relaxation” of digestion costs, a substantial portion of total energy expenditure likely has been saved. There are no data available on digestion costs in non-human primates but experimental studies indicate that domestic pigs of the size of normal-weight humans, with whom they share an omnivorous tendency and a functionally similar digestive system, show a  $\sim 1600 \text{ kJ.d}^{-1}$  reduction of the thermal effect of feeding when submitted to a 40 % decrease in the size of a  $\sim 2.4\text{-kg}$  readily digestible meal [81]. Therefore, there has been a potential for significant net energy gain since early humans changed their diet by ingesting a lower amount of less fibrous food, with both quantitative and qualitative factors resulting in reduced digestion costs [82]. A substantial reduction in energy expenditure through this mechanism could offset both the increased energetic cost of the brain ( $815 \text{ kJ.d}^{-1}$  relative to this ape species, assuming a similar metabolic rate per unit of brain mass [61]) and the greater locomotion costs of hunter-gatherers relative to chimpanzees ( $< 700 \text{ kJ.d}^{-1}$ ). Indeed, the average daily energy cost of ranging is 31% greater in the Hadza (ie,  $297 \text{ kJ.d}^{-1}$ ; [64], and up to 66% greater in Ache (ie,  $700 \text{ kJ.d}^{-1}$ ), another hunter-gatherer society that travels almost 4 times more kilometres each day than chimpanzees (chimpanzees:  $4 \text{ km.d}^{-1}$  [64], Hadza:  $11.8 \text{ km.d}^{-1}$  [64], Ache:  $14.2 \text{ km.d}^{-1}$  [83]; data combined for both sexes). In this comparison with apes, the daily locomotor cost of the Ache was first calculated for each sex by multiplying the daily walking distance (M:  $19.2 \text{ km.d}^{-1}$ , F:  $9.9 \text{ km.d}^{-1}$  [83]) by the metabolic cost of walking ( $2.05 \text{ kJ.kg}^{-1}\text{km}^{-1}$  [64]) and body mass (M:  $59.6 \text{ kg}$ , F:  $51.8 \text{ kg}$  [83]).

## Supplementary tables

Table S1. Body size, food and energy intake in free-ranging non-human primates and human populations at subsistence level

| Species                          | Sex | Body weight<br>(g) | Food intake<br>wet weight<br>(g.day <sup>-1</sup> ) | Daily energy intake                           |                                              | Seasonal change<br>energy<br>(%) | Refs.                |
|----------------------------------|-----|--------------------|-----------------------------------------------------|-----------------------------------------------|----------------------------------------------|----------------------------------|----------------------|
|                                  |     |                    |                                                     | HEVD<br>high value<br>(kJ.day <sup>-1</sup> ) | LEVD<br>low value<br>(kJ.day <sup>-1</sup> ) |                                  |                      |
|                                  |     |                    |                                                     |                                               |                                              |                                  |                      |
| Non-human primates               |     |                    |                                                     |                                               |                                              |                                  |                      |
| <i>Lemur catta</i>               | M+F | 2280               | 447                                                 | 1207                                          | 910                                          | 133                              | [1, 2], this study   |
| <i>Eulemur sp</i>                | M+F | 1840               | 452                                                 | 1093                                          | 761                                          | 39                               | [1, 2], this study   |
| <i>Eulemur f. mayottensis</i>    | F   | 1840*              | 258                                                 | 773                                           | 597                                          | na                               | [3, 4], this study   |
| <i>Propithecus coronatus</i>     | M+F | 3600               | 238                                                 | 1069                                          | 715                                          | 46                               | [5], this study      |
| <i>Propithecus diadema</i>       | M+F | 5140               | na                                                  | 2250                                          | 1665                                         | -                                | [6, 7]               |
| <i>Propithecus verreauxi</i>     | M   | 3100               | 343                                                 | 1310                                          | 1020                                         | 116                              | [1], this study      |
| <i>Propithecus verreauxi</i>     | M+F | 2800               | 362                                                 | 1182                                          | 929                                          | 119                              | this study           |
| <i>Saguinus geoffroyi</i>        | M+F | 515*               | 125                                                 | na                                            | 381                                          | na                               | [8, 9]               |
| <i>Leontopithecus rosalia</i>    | F   | 650                | na                                                  | na                                            | 259 <sup>†</sup>                             | 165                              | [10]                 |
| <i>Cebus capucinus</i>           | M+F | 3000*              | 400                                                 | na                                            | 1324                                         | na                               | [8, 11]              |
| <i>Alouatta palliata</i>         | M+F | 7000*              | 1200                                                | na                                            | 2292                                         | na                               | [8, 12]              |
| <i>Alouatta pigra</i>            | M+F | 6640*              | 1096                                                | 3202                                          | 2369                                         | na                               | [13, 14]             |
| <i>Ateles chamek</i>             | M+F | 8250               | 1000                                                | na                                            | 2446                                         | na                               | [15]                 |
| <i>Papio cynocephalus</i>        | M   | 23120*             | 1361                                                | 6383                                          | 4723                                         | na                               | [9, 16]              |
| <i>Papio ursinus</i>             | F   | 15500              | 1900                                                | 3929                                          | 2908                                         | na                               | [17]                 |
| <i>Pongo pygmaeus</i>            | M+F | 62500*             | na                                                  | 14789                                         | 10944                                        | 391                              | [18, 19]             |
| <i>Pongo pygmaeus</i>            | M+F | 56700*             | na                                                  | 7038                                          | 5208                                         | 547                              | [19, 20]             |
| <i>Gorilla beringei beringei</i> | M   | 200000             | 18800                                               | na                                            | 38530                                        | none                             | [21]                 |
| <i>Gorilla gorilla gorilla</i>   | M   | 169000*            | 6852                                                | 21059                                         | 15584                                        | 65                               | [22, 23], this study |
| Humans                           | Sex | Body weight<br>(g) | Food intake<br>wet weight<br>(g.day <sup>-1</sup> ) | Energy intake<br>(kJ.day <sup>-1</sup> )      |                                              | Seasonal change<br>energy<br>(%) | Refs.                |
| Yassa                            | M+F | 56800              | 1678                                                | 10246                                         |                                              | 2                                | [24, 25]             |
| Mvae                             | M+F | 57100              | 1560                                                | 9527                                          |                                              | 3                                | [24, 25]             |
| (Ba)Kola                         | M+F | 46600              | 1598                                                | 9315                                          |                                              | 18                               | [24, 25]             |
| Duupa                            | M+F | 49350              | 1390                                                | 9227                                          |                                              | 2                                | [25, 26]             |
| Koma                             | M+F | 50800              | 1591                                                | 9677                                          |                                              | 10                               | [25, 26]             |
| Tamang, Ghale, Kami              | M+F | 47250              | 934                                                 | 9246                                          |                                              | 15                               | [27]                 |

Models for High Energy Value of the Diet (HEVD) and Low Energy Value of the Diet (LEVD) differ in the mode of calculation for total soluble carbohydrate content in the diet (note S2). “Seasonal change” is expressed as the % increase or decrease between the two most different seasons (or, for humans, crop periods, ritual and celebration periods versus lean periods). na: not available; Body mass data in non-human primates are taken from the original studies that estimated daily energy input (references indicated) or from other sources (\*). <sup>†</sup>: gross energy corrected for dry matter digestibility. Energy intake data presented for humans >20 years old were selected from the larger datasets used in the published studies indicated. See tables S2 and S4 for study sites and additional references.

Table S2. Study site, ecology and food intake (as dry matter) in non-human primates

| Species                          | Diet     | Study site                                       | Habitat                           | Body weight<br>(g) | Dry matter intake<br>(g.day <sup>-1</sup> ) | Refs.    |
|----------------------------------|----------|--------------------------------------------------|-----------------------------------|--------------------|---------------------------------------------|----------|
| <i>Lemur catta</i>               | F/O      | Berenty private reserve, Madagascar              | gallery forest                    | 2280               | 103                                         | -        |
| <i>Eulemur sp.</i>               | F/O      | Berenty private reserve, Madagascar              | gallery forest                    | 1840               | 94                                          | -        |
| <i>Eulemur f. mayottensis</i>    | F/O      | Saziley, Mayotte                                 | semi-deciduous dry forest         | 1840               | 67                                          | -        |
| <i>Lepilemur leucopus</i>        | Fol      | Berenty private reserve, Madagascar              | dry deciduous forest              | 609                | 65                                          | [36]     |
| <i>Propithecus coronatus</i>     | Fol      | Antrema, Madagascar                              | semi-deciduous dry forest         | 3600               | 92                                          | -        |
| <i>Propithecus diadema</i>       | Fol (sd) | Ranomafana, Madagascar                           | mid-mountain evergreen rainforest | 5140               | 210                                         | -        |
| <i>Propithecus verreauxi</i>     | Fol      | Berenty private reserve, Madagascar              | gallery forest                    | 3100               | 117                                         | -        |
| <i>Propithecus verreauxi</i>     | Fol      | Berenty private reserve, Madagascar              | dry deciduous forest              | 2800               | 94                                          | -        |
| <i>Saguinus geoffroyi</i>        | F/O      | BCI, Panama                                      | evergreen rainforest              | 515                | 31                                          | -        |
| <i>Leontopithecus rosalia</i>    | F/O      | Poco das Antas Biological Reserve, Brazil        | Atlantic coastal rainforest       | 650                | na                                          | -        |
| <i>Cebus capucinus</i>           | F/O      | BCI, Panama                                      | evergreen rainforest              | 3000               | 100                                         | -        |
| <i>Alouatta palliata</i>         | Fol      | BCI, Panama                                      | evergreen rainforest              | 7000               | 300                                         | -        |
| <i>Alouatta pigra</i>            | Fol      | Palenque National Park, Mexico                   | evergreen rainforest              | 6640               | na                                          | -        |
| <i>Alouatta seniculus</i>        | Fol      | Fica Merenberg, Colombia                         | high-altitude tropical forest     | 7300               | 266                                         | [37]     |
| <i>Ateles chamek</i>             | F/O      | Bolivia                                          | semi-humid forest                 | 8250               | 262                                         | -        |
| <i>Macaca fuscata</i>            | F/O      | Shimokita Peninsula, Honshu, Japan               | snow-covered forest area          | 12600              | 596                                         | [38]     |
| <i>Macaca fuscata</i>            | F/O      | Kinkazan island, Japan                           | cool temperate forest             | 8000               | 221                                         | [39]     |
| <i>Papio anubis</i>              | F/O      | Laikipia plateau, Kenya                          | grassland, dry woodland           | 18700              | 492                                         | [40]     |
| <i>Papio cynocephalus</i>        | F/O      | Amboseli National Park, Kenya                    | savannah, woodland                | 23120              | na                                          | -        |
| <i>Papio ursinus</i>             | F/O      | Table Mountain National Park, South Africa       | shrubland, plantations            | 15500              | na                                          | -        |
| <i>Theropithecus gelada</i>      | Fol      | Simen Mountain National Park, Ethiopia           | tropical alpine vegetation        | 18500              | 898                                         | [41]     |
| <i>Semnopithecus entellus</i>    | Fol      | Polonnaruwa, Sri Lanka                           | semi-deciduous dry forest         | 8650               | 321                                         | [35, 42] |
| <i>Semnopithecus vetulus</i>     | Fol      | Polonnaruwa, Sri Lanka                           | semi-deciduous dry forest         | 6240               | 188                                         | [35, 43] |
| <i>Pongo pygmaeus</i>            | F/O      | Sabangau, Central Kalimantan, Indonesia          | peat-swamp forest                 | 56700              | 641                                         | [20]     |
| <i>Gorilla beringei beringei</i> | Fol      | Bwindi Park, Uganda                              | mid- and mountain rainforest      | 200000             | 3948                                        | -        |
| <i>Gorilla gorilla gorilla</i>   | F/O, Fol | Dzanga-Ndoki Nat. Park, Central African Republic | evergreen rainforest              | 169000             | 2059                                        | -        |

F/O : Frugivore/omnivore ; Fol : folivore; sd: seed-eater

References: see table S1; additional references where mentioned

Table S3: High Energy Value of the Diet (HEVD) and Low Energy Value of the Diet (LEVD) in primates feeding on different staple foods

| Staple food/Species                    | Habitat/season | Soluble sugars  |             | Daily energy intake            |                                |                      |
|----------------------------------------|----------------|-----------------|-------------|--------------------------------|--------------------------------|----------------------|
|                                        |                |                 |             | High value                     | Low value                      | % of                 |
|                                        |                | % dw            | % of TNCsub | (HEVD)<br>kJ.day <sup>-1</sup> | (LEVD)<br>kJ.day <sup>-1</sup> |                      |
| A. Ripe fruit diet                     |                |                 |             |                                |                                |                      |
| <i>Lemur catta</i>                     | GF/ ws         | 38.7            | 60.9        | 1412                           | 1159                           | 82                   |
| <i>Eulemur</i> sp.                     | GF/ lds        | 9.4             | 24.2        | 908                            | 610                            | 67                   |
| "                                      | GF/ ws         | 21.8            | 43.2        | 1146                           | 870                            | 76                   |
| <i>Eulemur fulvus mayottensis</i>      | DSDF / ds      | 18.9            | 42.4        | 773                            | 597                            | 77                   |
| "                                      | DSDF / ws      | 35.7            | 57.4        | 1214                           | 971                            | 80                   |
| <i>Eulemur macaco</i>                  | SHF/ ws        | 36.3            | 61.5        | 1774                           | 1492                           | 84                   |
|                                        | mean:          | 26.8 ± 10.8     | 47.7 ± 13.4 |                                |                                | 78 ± 6               |
| B. Ripe fruit/leaf diet                |                |                 |             |                                |                                |                      |
| <i>Ateles chamek</i>                   | SHF/ws,ds      | 34 <sup>*</sup> | 70          | 2945 <sup>†</sup>              | 2456 <sup>†</sup>              | 83                   |
| C. Vegetative and/or unripe fruit diet |                |                 |             |                                |                                |                      |
| <i>Lemur catta</i>                     | GF / ds        | 6.6             | 17.7        | 727                            | 473                            | 65                   |
| "                                      | GF / lds       | 9.3             | 25.1        | 1201                           | 866                            | 72                   |
| <i>Eulemur</i> sp.                     | GF / ds        | 6.6             | 18.2        | 1111                           | 715                            | 64                   |
| <i>Propithecus verreauxi</i>           | GF / ds        | 5.3             | 17.2        | 806                            | 611                            | 76                   |
| "                                      | GF / lds       | 4.4             | 19.6        | 1743                           | 1525                           | 87                   |
| "                                      | GF / ws        | 6.5             | 15.9        | 1255                           | 839                            | 67                   |
| <i>Propithecus verreauxi</i>           | DDF / ds       | 4.7             | 11.5        | 740                            | 492                            | 66                   |
|                                        | DDF / ew       | 4.8             | 15.1        | 1623                           | 1365                           | 84                   |
| <i>Propithecus coronatus</i>           | DSDF / eds     | 3               | 7.4         | 905                            | 557                            | 62                   |
| "                                      | DSDF / ds      | 4.3             | 10.6        | 982                            | 614                            | 63                   |
| "                                      | DSDF / ws      | 3.2             | 10.3        | 1320                           | 975                            | 74                   |
|                                        | mean:          | 5.3 ± 1.8       | 15.3 ± 5.1  |                                |                                | 70 ± 8               |
|                                        |                |                 |             |                                |                                | overall mean: 74 ± 8 |

The average amount of metabolizable calories ingested daily is expressed according to two ways of estimating TNC, either by subtraction (HEVD) or taking into account the concentration of simple soluble sugars supplemented with estimates of starch and pectin concentrations (LEVD; electronic supplementary material, note S2). The comparison is made using weighted intake data and diets for which the concentration of simple soluble sugars and of total non-structural carbohydrates (by subtraction: TNCsub) is available. Data are means  $\pm$  standard deviation where indicated. \*: Water-soluble sugars + starch, †: data calculated from table II in [48].

GF: galerie forest; DSDF: dry semi-deciduous forest; SHF: semi-humid forest; DDF: dry deciduous forest. ws: wet season; ds: dry season; eds: early dry season; lds: late dry season; ew: early wet season

Table S4. Study site and food production system in human populations at subsistence level selected according to data available on food intake

| <b>Humans</b>       | <b>Staple food</b>                       | <b>Area</b>                          | <b>Lifestyle</b>                      |
|---------------------|------------------------------------------|--------------------------------------|---------------------------------------|
| Yassa               | cassava, fish                            | Southern Cameroon, coastal           | fishing, farming                      |
| Mvae                | cassava, vegetables, fruits, meat, fish  | Southern Cameroon, forest            | hunter-farmers                        |
| Bakola              | cassava, meat, vegetables                | Southern Cameroon, forest            | hunter-gatherers, rudimentary farming |
| Duupa               | cereals, legumes, vegetables, peanuts    | Northern Cameroon, mountain savannah | farmers                               |
| Koma                | cereals, tubers, vegetables              | Northern Cameroon, mountain savannah | farmers                               |
| Tamang, Ghale, Kami | cereals, vegetables, tubers, roots, milk | Nepal, mid-altitude hills            | farmers                               |

References: see table S1

Table S5. Daily energy intake and energy expenditure measured by doubly labeled water (dlw) or estimated by indirect calorimetry (ic).

| Non-human primates            | Energy intake                  |                                | Energy expenditure            |                      |               |                               |
|-------------------------------|--------------------------------|--------------------------------|-------------------------------|----------------------|---------------|-------------------------------|
|                               | (HEVD)<br>kJ.day <sup>-1</sup> | (LEVD)<br>kJ.day <sup>-1</sup> | kJ.day <sup>-1</sup>          |                      |               |                               |
| <i>Lemur catta</i>            | 1,201                          | 866                            | 626 (dlw)                     |                      |               |                               |
| <i>Eulemur sp</i>             | 908                            | 611                            | 610 (dlw)                     |                      |               |                               |
| <i>Propithecus diadema</i>    | 2,250                          | 1,665                          | 1,446 (dlw)                   |                      |               |                               |
| <i>Alouatta palliata</i>      | -                              | 2,292                          | 2,497 (dlw)                   |                      |               |                               |
| <i>Papio cynocephalus</i>     | 3,903                          | 2,888                          | 3,400 (dlw)                   |                      |               |                               |
| <i>Papio ursinus</i> *        | 3,929                          | 2,908                          | 3,480 (dlw)                   |                      |               |                               |
| <i>Pongo pygmaeus</i>         | 10,216                         | 7,559                          | 6,464 (dlw)                   |                      |               |                               |
| <i>Gorilla gorilla</i> (male) | 21,059                         | 15,584                         | 15,173 (dlw)                  |                      |               |                               |
| Human populations             | Energy intake                  |                                | Energy expenditure            |                      | PAL           |                               |
|                               | kJ.day <sup>-1</sup>           | % of primate LEVD <sup>†</sup> | % of primate TEE <sup>†</sup> | kJ.day <sup>-1</sup> |               | % of primate TEE <sup>†</sup> |
| <i>Present study</i>          |                                |                                |                               |                      |               |                               |
| Yassa men                     | 11,416                         | 116                            | 125                           | 11,240 (ic)          | 123           | 1.67 (1.63-1.69)              |
| Yassa women                   | 9,075                          | 102                            | 109                           | 8,770 (ic)           | 106           | 1.65 (1.63-1.68)              |
| Mvae men                      | 10,225                         | 105                            | 112                           | 9,500 (ic)           | 104           | - (1.55)                      |
| Mvae women                    | 8,828                          | 98                             | 105                           | 9,020 (ic)           | 107           | 1.69 (1.66-1.76)              |
| BaKola men                    | 9,827                          | 116                            | 124                           | -                    | -             | -                             |
| BaKola women                  | 8,803                          | 115                            | 123                           | -                    | -             | -                             |
| Duupa men                     | 10,648                         | 121                            | 130                           | 11,000 (ic)          | 134           | 1.77 (1.67-1.92)              |
| Duupa women                   | 7,806                          | 97                             | 104                           | 9,111 (ic)           | 121           | 1.78 (1.64-1.90)              |
| Koma men                      | 11,403                         | 129                            | 138                           | 11,200 (ic)          | 136           | 1.81 (1.70-2.00)              |
| Koma women                    | 7,950                          | 95                             | 102                           | 9,270 (ic)           | 119           | 1.80 (1.71-1.94)              |
| Tamang, Ghale, Kami men       | 9,718                          | 113                            | 120                           | -                    | -             | -                             |
| Tamang, Ghale, Kami women     | 8,774                          | 115                            | 122                           | -                    | -             | -                             |
| <i>Mean:</i>                  |                                | <i>110±11</i>                  | <i>118±11</i>                 |                      | <i>119±12</i> | <i>1.75±0.06</i>              |

The physical activity level (PAL), ie the ratio of daily energy expenditure to basal metabolic rate, is given as mean and range across 3 seasons excepted for Mvae men where only dry season data are available. Other species or population data presented as means. *Non-human primates*. Paired-comparison between daily energy intake (using HEVD and LEVD modes of calculation; see Main text and Note S2) and total energy expenditure (TEE) across species. Subjects have approximately similar body size, except in *Papio cynocephalus* where the energy intake of adult males was rescaled according to body mass<sup>0.75</sup> for comparison with female TEE in this dimorphic species; \*: TEE data for *Papio anubis* (omnivorous diet and body mass similar to *P. ursinus*); †: percent of expected values is calculated from the Energy intake(LEVD):body mass regression (this study, table 1) or from the TEE:body mass regression in [65] ( $\log(\text{TEE, in kCal.day}^{-1}) = 2.032 + 0.734 \log(\text{body mass, in g})$ , with TEE converted in kJ.day<sup>-1</sup> using a 4.18 multiplication factor).

Same references as in table S1, except for primate TEE [65].

## Supplementary figures

Figure S1. Phylogenetic tree built for phylogenetic least square regression analyses.

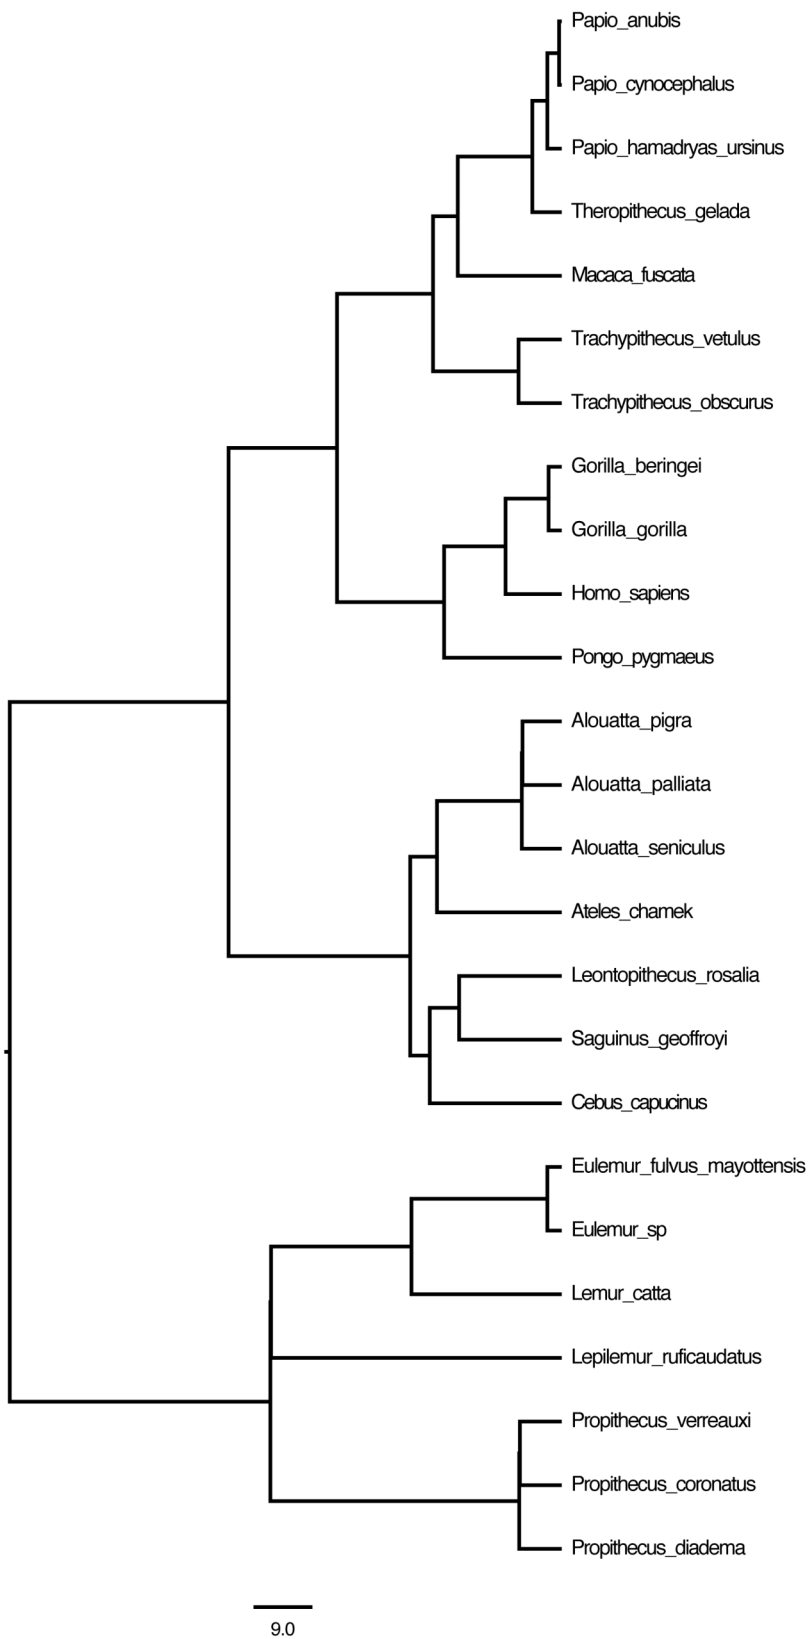

Figure S2. Relationship between daily energy intake, total energy expenditure (TEE) and species body weight in primates. The solid yellow and orange regression lines refer respectively to the “High Energy Value of the Diet” (HEVD: squares) and “Low Energy Value of the Diet” (LEVD: circles) databases for non-human primates (Material and Methods). The solid black line shows the scaling of TEE (measured with doubly labelled water) with body mass in captive and wild primates (diamonds), after [65]. Regressions using best-fit models are derived from phylogenetically controlled analysis.

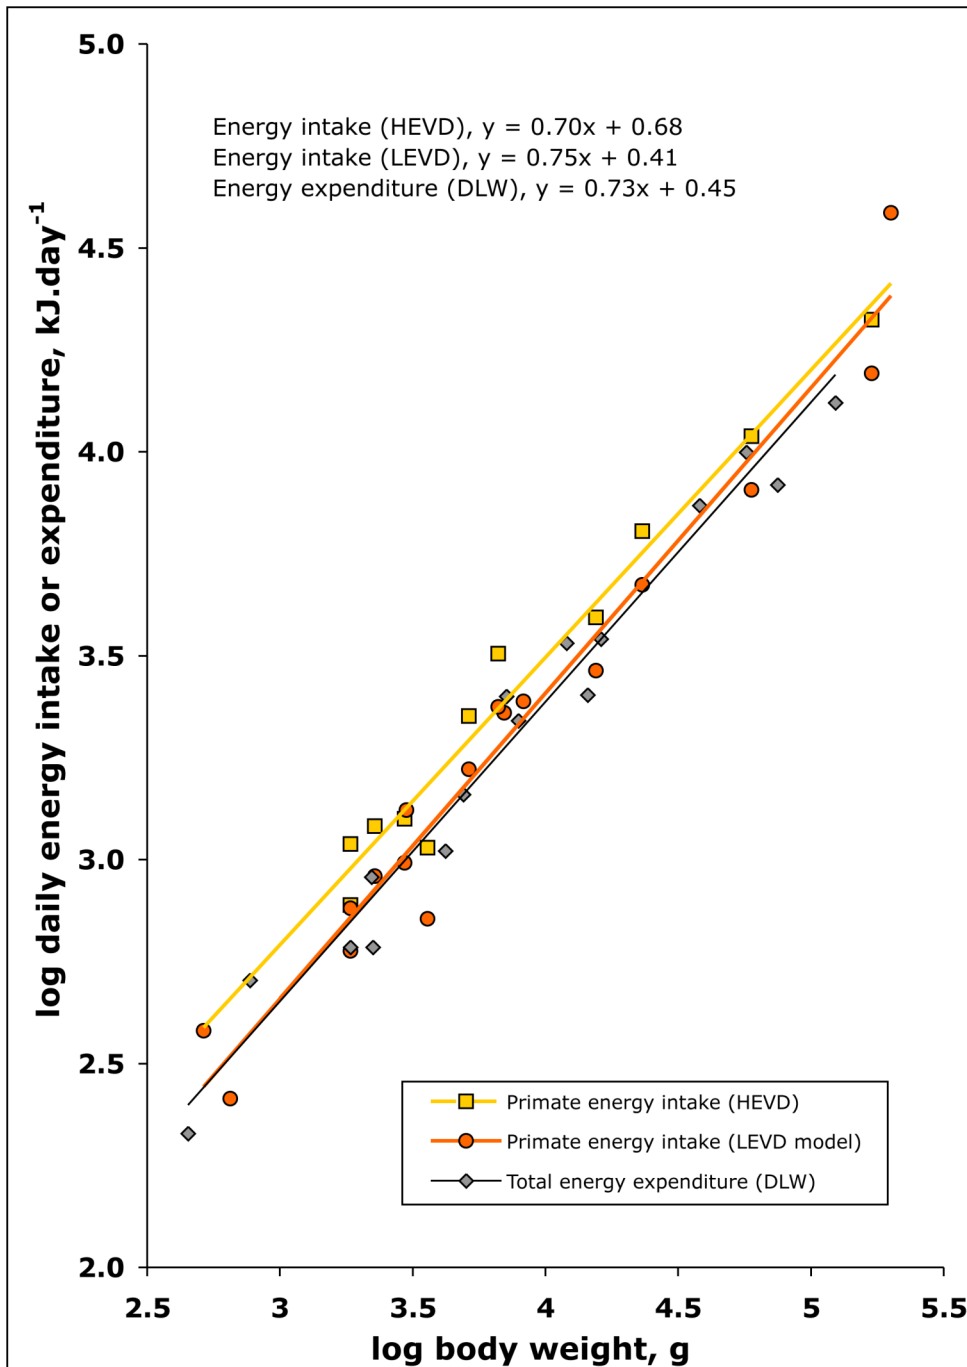

Figure S3. Daily food intake (as dry matter ingested) in wild non-human primates. Regression using the best-fit model derived from phylogenetically controlled analysis (table 1). The dotted lines show the 95% confidence interval for the regression line.

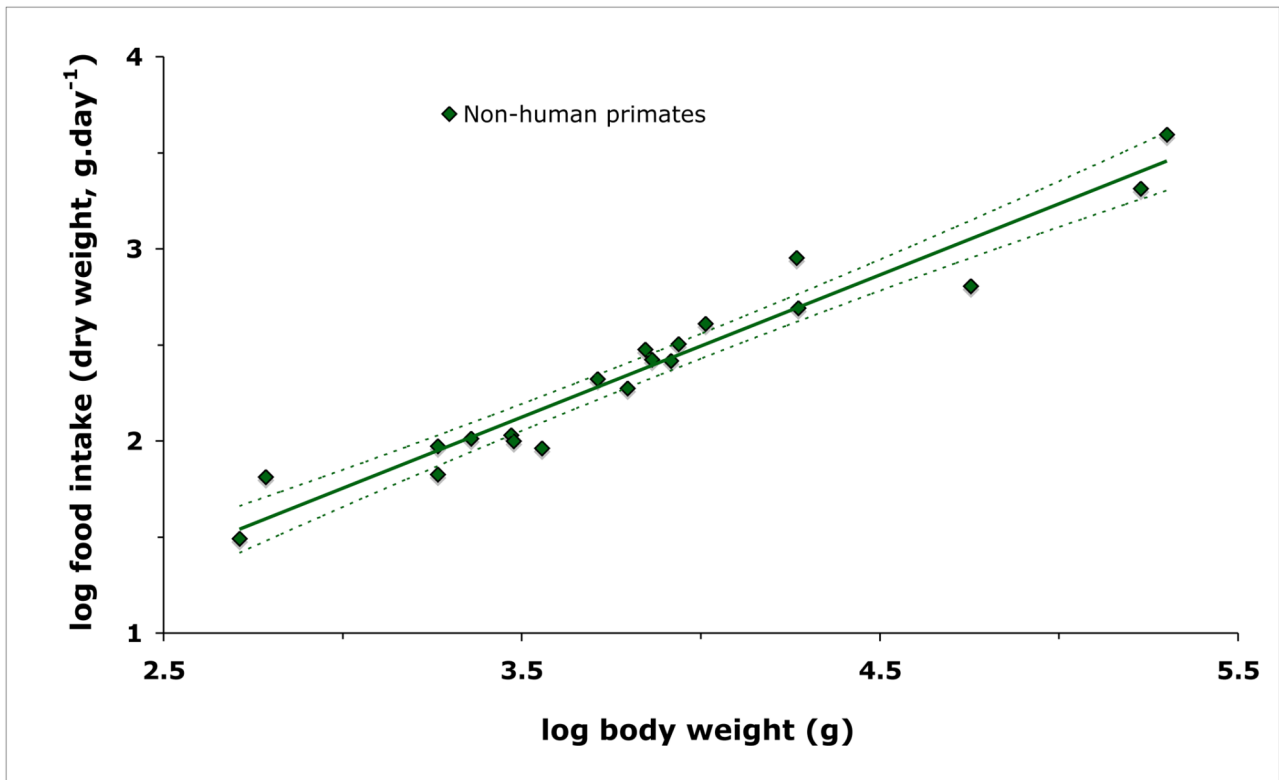

## Supplementary references

1. Simmen B, Hladik A, Ramasiarisoa P. 2003 Food intake and dietary overlap in native *Lemur catta* and *Propithecus verreauxi* and introduced *Eulemur fulvus* at Berenty, Southern Madagascar. *Int. J. Primatol.* **24**, 949–968.
2. Simmen B, Bayart F, Rasamimanana H, Zahariiev A, Blanc S, Pasquet P. 2010 Total energy expenditure and body composition in two free-living sympatric lemurs. *Plos ONE* **5**, e9860.
3. Tarnaud L. 2002 *L'ontogénèse du comportement alimentaire du primate Eulemur fulvus en forêt sèche (Mayotte, Archipel des Comores) en relation avec le lien mère-jeune et la disponibilité des ressources alimentaires*. PhD thesis, Paris: University Paris 5.
4. Tarnaud L. 2006 Cathemerality in the Mayotte brown lemur (*Eulemur fulvus*): seasonality and food quality. *Folia Primatol.* **77**, 166–177.
5. Pichon C, Simmen B. 2015 Energy management in Crowned sifakas (*Propithecus coronatus*) and the timing of reproduction in a seasonal environment. *Am. J. Phys. Anthropol.* **158**, 269–278.
6. Irwin MT, Junge RE, Raharison JL, Samonds, KE. 2010 Variation in physiological health of Diademed sifakas across intact and fragmented forest at Tsinjoarivo, Eastern Madagascar. *Am. J. Primatol.* **72**, 1013–1025
7. Irwin MT, Raharison JL, Raubenheimer D, Chapman CA, Rothman JM. 2014 Nutritional correlates of the “lean season”: effects of seasonality and frugivory on the nutritional ecology of Diademed sifakas. *Am. J. Phys. Anthropol.* **153**, 78–91.
8. Hladik CM, Hladik A, Bousset J, Valdebouze P, Viroben G, Delort-Laval J. 1971 Le regime alimentaire des primates de l'île de Barro Colorado (Panama). *Folia Primatol.* **16**, 85–122.
9. Isler K, Kirk EC, Miller JMA, Albrecht GE, Gelvin BR, Martin RD. 2008 Endocranial volumes of primate species: scaling analyses using a comprehensive and reliable data set. *J. Hum. Evol.* **55**, 967–978.

10. Miller KE, Bales KL, Ramos JH, Dietz JM. 2006 Energy intake, energy expenditure, and reproductive costs of female wild Golden lion tamarins (*Leontopithecus rosalia*). *Am. J. Primatol.* **68**, 1037–1053.
11. Crofoot MC *et al.* 2009 Field anesthesia and health assessment of free-ranging *Cebus capucinus* in Panama. *Int. J. Primatol.* **30**, 125–141.
12. Glander KE. 2006 Average body weight for Mantled howling monkeys (*Alouatta palliata*): an assessment of average values and variability. In *New perspectives in the study of mesoamerican primates. Part of the series Developments in primatology: progress and prospects* (eds A Estrada , PGA Garber, MSM Pavelka, L Luecke), pp. 247–263. New York: Springer.
13. Amato KR, Garber PA. 2014 Nutrition and foraging strategies of the Black howler monkey (*Alouatta pigra*) in Palenque National Park, Mexico. *Am. J. Primatol.* **76**, 774–787.
14. Kelaita M *et al.* 2011 Impact of intrasexual selection on sexual dimorphism and testes size in the Mexican howler monkeys *Alouatta palliata* and *A. pigra*. *Am. J. Phys. Anthropol.* **146**, 179–187.
15. Felton AM *et al.* 2009 Protein content of diets dictates the daily energy intake of a free-ranging primate. *Behav. Ecol.* **20**, 685–690.
16. Stacey PB. 1986 Group size and foraging efficiency in yellow baboons. *Behav. Ecol. Sociobiol.* **18**, 175–187.
17. Johnson CA, Raubenheimer D, Rothman JM, Clarke D, Swedel L. 2013 30 days in the life: daily nutrient balancing in a wild Chacma baboon. *PLoS ONE* **8**, e70383.
18. Conklin-Brittain NL, Knott CD, Wrangham RW. 2006 Energy intake by wild chimpanzees and orangutans: methodological considerations and a preliminary comparison. In *Feeding ecology in apes and other primates. Ecological, physical and behavioral aspects* (eds G Hohmann, MM Robbins, C Boesch), pp. 445–571. Cambridge: Cambridge University Press.
19. Markham R, Groves CP. 1990 Brief communication: weights of wild orang-utans. *Am. J. Phys. Anthropol.* **81**, 1–3.

20. Harrison ME, Morrogh-Bernard HC, Chivers DJ. 2010 Orangutan energetics and the influence of fruit availability in the nonmasting peat-swamp forest of Sabangau, Indonesian Borneo. *Int. J. Primatol.* **31**, 585–607.
21. Rothman JM, Dierenfeld AS, Hintz HF, Pell AN. 2008 Nutritional quality of gorilla diets: consequences of age, sex, and season. *Oecologia* **155**, 111–122.
22. Masi S, Mundry R, Ortmann S, Cipoletta C, Boitani L, Robbins MM. 2015 The influence of seasonal frugivory on nutrient and energy intake in wild Western gorillas. *PLoS ONE* **10**, e0129254.
23. Leigh SR, Shea BT. 1996 Ontogeny of body size variation in African apes. *Am. J. Phys. Anthropol.* **99**, 43–65.
24. Koppert GJA, Dounias E, Froment A, Pasquet P. 1993 Food consumption in three forest populations of the southern coastal area of Cameroon: Yassa - Mvae – Bakola. In *Tropical forest, people and food: biocultural interactions and applications to development. Man and the biosphere, series vol.15* (eds CM Hladik CM, A Hladik, H Pagezy, OF Linares, GJA Koppert, A Froment), pp. 279–293. Paris: Parthenon-UNESCO.
25. Froment A, Koppert GJA. 1996 État nutritionnel et sanitaire en zone de forêt et de savane au Cameroun. In *Bien manger et bien vivre. Anthropologie alimentaire et développement en Afrique intertropicale: du biologique au social* (eds A Froment, I de Garine, C Binam Bikoi, JF Loung), pp. 271–288. Paris: ORSTOM/L'Harmattan.
26. Koppert GJA, Rikong Adié H, Gwangwa'a S, Sajo Nana E, Matze M, Pasquet P, Froment A, de Garine I. 1996 La consommation alimentaire dans différentes zones écologiques et économiques du Cameroun. In *Bien manger et bien vivre. Anthropologie alimentaire et développement en Afrique intertropicale: du biologique au social* (eds A Froment, I de Garine, C Binam Bikoi, JF Loung), pp. 237–254. Paris: ORSTOM/L'Harmattan.
27. Koppert GJA. 1993 Alimentation et croissance chez les Tamang, les Ghale et les Kami du Népal. *Bull. Mém. Soc. Anthropol. Paris* **5**, 379–400.

28. Hladik CM. 2011 Considerations on field methods used to assess non-human primate feeding behaviour and human food intake in terms of nutritional requirements. In *Centralizing fieldwork: critical perspectives from primatology, biological anthropology and social anthropology*. Vol. 4 (eds J Mac-Clancy, A Fuentes), pp. 170–185. Oxford: Berghahn Books.
29. Rothman JM, Chapman CA, Van Soest PJ. 2012 Methods in primate nutritional ecology: a user's guide. *Int. J. Primatol.* **33**, 542–566. (doi:10.1007/s10764-011-9568-x)
30. Zinner D. 1999 Relationship between feeding time and food intake in hamadryas baboons (*Papio hamadryas*) and the value of feeding time as predictor of food intake. *Zoo Biol.* **18**, 495–505.
31. Hladik A, Hladik CM. 1969. Rapports trophiques entre végétation et primates dans la forêt de Barro Colorado (Panama). *Terre Vie* **1**, 25–117.
32. Koppert GJA, Hladik CM. 1990 Measuring food consumption. In Food and nutrition in the African rainforest (eds CM Hladik, S Bahuchet, I de Garine), pp. 59-61. Paris: UNESCO/MAB.
33. FAO/OMS. 1974 Manuel sur les besoins nutritionnels de l'Homme. (*Série monographie n° 61*, Geneva, OMS, 64p.).
34. Koppert GJA. 1996 Méthodologie de l'enquête alimentaire. In Bien manger et bien vivre. Anthropologie alimentaire et développement en Afrique intertropicale: du biologique au social (eds A Froment, I de Garine , C Binam Bikoi, JF Loung), pp. 89–98. Paris: ORSTOM/L'Harmattan.
35. Hladik CM. 1977 A comparative study of the feeding strategies of two sympatric species of leaf monkeys: *Presbytis senex* and *Presbytis entellus*. In *Primate ecology: studies of feeding and ranging behaviour in lemurs, monkeys and apes* (ed TH Clutton-Brock), pp. 323–353. London: Academic Press.
36. Dröscher I. 2014 *Behavioral and feeding ecology of a small-bodied folivorous primate* (*Lepilemur leucopus*). PhD thesis, Göttingen: University Georg-August.

37. Gaulin SJC, Gaulin CK. 1982 Behavioral ecology of *Alouatta seniculus* in Andean cloud forest. *Int. J. Primatol.* **3**, 1–32.
38. Nakayama Y, Matsuoka S, Watanuki Y. 1999 Feeding rates and energy deficits of juveniles and adult Japanese monkeys in a cool temperate area with snow coverage. *Ecol. Res.* **14**, 291–301.
39. Nakagawa N. 1997 Determinants of the dramatic seasonal changes in the intake of energy and protein by Japanese monkeys in a cool temperate forest. *Am. J. Primatol.* **41**, 267–288.
40. Barton RA. 1992 Allometry of food intake in free-ranging anthropoid primates. *Folia Primatol.* **58**, 56–59.
41. Iwamoto T. 1979 Feeding ecology. In *Ecological and sociological studies of gelada baboons. Contributions to primatology 16* (ed M. Kawai), pp. 279–335. Basel: Karger.
42. Oates JF, Davies AG, Delson E. 1994 The diversity of living colobines. In *Colobine monkeys: their ecology, behaviour and evolution* (eds AG Davies, JF Oates), pp. 45–73. Cambridge: Cambridge University Press.
43. Isler K, Kirk EC, Miller JMA, Albrecht GE, Gelvin BR, Martin RD. 2008 Endocranial volumes of primate species: scaling analyses using a comprehensive and reliable data set. *J. Hum. Evol.* **55**, 967–978.
44. Conklin-Brittain NL, Knott CD, Wrangham RW. 2006 Energy intake by wild chimpanzees and orangutans: methodological considerations and a preliminary comparison. In *Feeding ecology in apes and other primates. Ecological, physical and behavioral aspects* (eds G Hohmann, MM Robbins, C Boesch), pp. 445–571. Cambridge: Cambridge University Press.
45. Livesey G. 1995 The impact of complex carbohydrates on energy balance. *Eur. J. Clin. Nutr.* **49**, S89–S96.
46. FAO. 1998 Carbohydrates in human nutrition. *Report of a joint FAO/WHO expert consultation* (FAO Food and Nutrition Paper 66, Rome, 129 p.).

47. Irwin MT, Raharison JL, Raubenheimer D, Chapman CA, Rothman JM. 2014 Nutritional correlates of the “lean season”: effects of seasonality and frugivory on the nutritional ecology of Diademed sifakas. *Am. J. Phys. Anthropol.* **153**, 78–91.
48. Felton A, Wood JT, Foley WJ, Raubenheimer D, Wallis IR, Lindenmayer DB. 2009 Nutritional ecology of *Ateles chamek* in lowland Bolivia: how macronutrient balancing influences food choices. *Int. J. Primatol.* **30**, 675–696.
49. Rothman JM, Dusiherre K, Pell AN. 2009 Condensed tannins in the diets of primates: a matter of methods? *Am. J. Primatol.* **71**, 70–76.
50. Giner-Chavez BI, Van Soest PJ, Robertson JB, Lascano C, Reed JD, Pell AN. 1997 A method for isolating condensed tannins from crude plant extracts with trivalent ytterbium. *J. Sci. Food. Agric.* **74**, 359–368.
51. Ganas J, Ortmann S, Robbins MM. 2009 Food choices of the mountain gorilla in Bwindi Impenetrable National Park, Uganda: the influence of nutrients, phenolics and availability. *J. Trop. Ecol.* **25**, 123–134.
52. Oboh G, Ademosun AO, Akinleye M, Omojokun OS, Boligon AA, Athayde ML. 2015 Starch composition, glycemic indices, phenolic constituents, and antioxidative and antidiabetic properties of some common tropical fruits. *J. Ethn. Foods* **2**, 64–73.
53. Milton K. 1991 Pectic substances in neotropical plant parts. *Biotropica* **23**, 90–92.
54. Mahattanatawee K, Manthey JA, Luzio G, Talcott ST, Goodner K, Baldwin EA. 2006 Total antioxidant activity and fiber content of select Florida-grown tropical fruits. *J. Agr. Food Chem.* **54**, 7355–7363.
55. Campbell JL, Williams CV, Eisemann JH. 2004 Use of total dietary fiber across four lemur species (*Propithecus verreauxi coquereli*, *Hapalemur griseus griseus*, *Varecia variegata*, and *Eulemur fulvus*): does fiber type affect digestive efficiency? *Am. J. Primatol.* **64**, 323–335.
56. Overdorff DJ, Rasmussen MA. 1995 Determinants of nighttime activity in “diurnal” lemurid primates. In *Creatures of the Dark* (ed L Alterman), pp. 61–84. New York: Plenum Press.

57. Schmidt DA *et al.* 2005 Fiber digestibility by black lemurs (*Eulemur macaco macaco*). *J. Zoo Wildl. Med.* **36**, 204–211.
58. Campbell JL, Eisemann JH, Glander KE, Crissey SE. 1999 Intake, passage, and digestibility of a commercially designed diet by two *Propithecus* species. *Am. J. Primatol.* **48**, 237–246.
59. Edwards MS, Ullrey DE. 1999 Effect of dietary fiber concentration on apparent digestibility and digesta passage in non-human primates. II. Hindgut- and foregut-fermenting folivores. *Zoo Biol.* **18**, 537–549.
60. Edwards MS, Ullrey DE. 1999 Effect of dietary fiber concentration on apparent digestibility and digesta passage in non-human primates. I. Ruffed lemurs (*Varecia variegata variegata* and *V.v. rubra*). *Zoo Biol.* **18**, 529–536.
61. Pontzer H. 2015 Energy expenditure in humans and other primates: a new synthesis. *Annu. Rev. Anthropol.* **44**, 169–187.
62. Nagy KA, Girard IA, Brown TK. 1999 Energetics of free-ranging mammals, reptiles, and birds. *Annu. Rev. Nutr.* **19**, 247–277.
63. Pontzer H *et al.* 2016a Constrained total energy expenditure and metabolic adaptation to physical activity in adult humans. *Curr. Biol.* **26**, 410–417.
64. Pontzer H *et al.* 2016b Metabolic acceleration and the evolution of human brain size and life history. *Nature* **533**, 390–392. (doi:10.1038/nature17654)
65. Pontzer H *et al.* 2014 Primate energy expenditure and life history. *Proc. Natl. Acad. Sci. USA* **111**, 1433–1437. (doi:10.1073/pnas.1316940111)
66. Carmody RN, Weintraub GS, Wrangham RW. 2011 Energetic consequences of thermal and nonthermal food processing. *Proc. Natl. Acad. Sci. USA* **108**, 19199–19203. (doi:10.1073/pnas.1112128108)
67. Pasquet P, Koppert GJA. 1993 Activity patterns and energy expenditure in Cameroonian tropical forest populations. In *Tropical forest, people and food: biocultural interactions and applications to development. Man and the biosphere series vol.13.* (eds CM Hladik CM, A

Hladik, H Pagezy, OF Linares, GJA Koppert, A Froment), pp. 311–320. Paris: Parthenon-UNESCO.

68. Geissler CA, Dzumbira TMO, Noor MI. 1986 Validation of a field technique for the measurement of energy expenditure: factorial method versus continuous respirometry. *Am. J. Clin. Nutr.* **44**, 596–602.
69. Pasquet P, Brigant L, Froment A, Koppert GA, Bard D, de Garine I, Apfelbaum M. 1992 Massive overfeeding and energy balance in men: the *Guru Walla* model. *Am. J. Clin. Nutr.* **56**, 483–490.
70. Dufour DL, Piperata BA. 2008 Energy expenditure among farmers in developing countries: what do we know? *Am. J. Hum. Biol.* **20**, 249–258.
71. Dugas LR, Harders R, Merrill S, Ebersole K, Shoham DA, Rush EC, Assah FK, Forrester T, Durazo-Arvizu RA, Luke A. 2011 Energy expenditure in adults living in developing compared with industrialized countries: a meta-analysis of doubly labeled water studies. *Am. J. Clin. Nutr.* **93**, 427–41.
72. Pagel M. 1997 Inferring evolutionary processes from phylogenies. *Zool. Scr.* **26**, 331–348.
73. Bininda-Emonds ORP *et al.* 2007 The delayed rise of present-day mammals. *Nature* **446**, 507–512.
74. Perelman P *et al.* 2011 A molecular phylogeny of living Primates. *PLoS Genet.* **7**, e1001342.
75. Zinner D, Wertheimer J, Liedigk R, Groeneveld LF, Christian Roos C. 2013 Baboon phylogeny as inferred from complete mitochondrial genomes. *Am. J. Phys. Anthropol.* **150**, 133–140.
76. Pagel M, Meade A, Barker D. 2004 Bayesian estimation of ancestral character states on phylogenies. *Syst. Biol.* **53**, 673–84.
77. Freckleton RP, Harvey PH, Pagel M. 2002 Phylogenetic analysis and comparative data: a test and review of evidence. *Am. Nat.* **160**, 712–726.
78. Felsenstein J. 1993 Maximum-likelihood estimation of evolutionary trees from continuous characters. *Am. J. Hum. Genet.* **25**, 471–492.

79. Secor SM. 2009 Specific dynamic action, a review of the postprandial metabolic response. *J. Comp. Physiol.* **179**,1–56.
80. Yasuoka H. 2006 Long-term foraging expeditions (*Molongo*) among the Baka hunter-gatherers in the Northwestern Congo Basin, with special reference to the “wild yam question”. *Hum. Ecol.* **34**, 275–296. (doi:10.1007/s10745-006-9017-1)
81. Lovatto PA, Sauvant D, Noblet J, Dubois S, van Milgen J. 2006 Effects of feed restriction and subsequent refeeding on energy utilization in growing pigs. *J. Anim. Sci.* **84**, 3329–3336.
82. Barboza PS *et al.* 2010 Digestive challenges for vertebrate animals: microbial diversity, cardiorespiratory coupling, and dietary specialization. *Physiol. Biochem. Zool.* **83**, 764–774.
83. Leonard WR, Robertson ML. 1997 Comparative primate energetics and hominid evolution. *Am. J. Phys. Anthrop.* **102**, 265–281.
